# Supplementary material
Source: Elsevier journal article supplement (https://www.sciencedirect.com/science/article/pii/S0300289621000569)
Supplement: mmc1 [file S0300289621000569:mmc1.pdf]

## MATERIAL SUPLEMENTARIO

### Lobo JL, et al. Consenso multidisciplinar para el manejo de la tromboembolia de pulmón

*1.- ¿Es seguro el uso aislado (sin necesidad de ninguna otra prueba adicional) de la escala PERC para descartar la TEP en el Servicio de Urgencias?*

**Se recomienda no utilizar la escala PERC de forma aislada (sin necesidad de ninguna otra prueba diagnóstica adicional) para descartar la TEP en el Servicio de Urgencias.**

**Tabla S1. Escalas de puntuación de Wells para la graduación de la probabilidad clínica en la tromboembolia pulmonar aguda sintomática**

| Variables                                                       | Puntuación |
|-----------------------------------------------------------------|------------|
| Diagnóstico alternativo menos probable que la TEP               | 3.0        |
| Síntomas o signos de TVP                                        | 3.0        |
| Antecedentes de TEP o TVP                                       | 1.5        |
| Inmovilización de al menos 3 días o cirugía en el último mes    | 1.5        |
| Frecuencia cardíaca >100/minuto                                 | 1.5        |
| Hemoptisis                                                      | 1.0        |
| Cáncer en tratamiento activo o paliativo en los últimos 6 meses | 1.0        |

Baja probabilidad: < 2 puntos

Intermedia probabilidad: 2-6 puntos

Alta probabilidad: ≥ 6 puntos

**Abreviaturas:** TEP, tromboembolia de pulmón; TVP, trombosis venosa profunda.

3.- ¿Cuáles son las indicaciones de la gammagrafía V/Q (vs. angioTC de tórax) en el algoritmo diagnóstico del paciente con sospecha de TEP aguda sintomática?

**Se sugiere no utilizar la gammagrafía V/Q en lugar de la angioTC de tórax como prueba de imagen para el diagnóstico de la mayoría de los pacientes con sospecha de TEP aguda sintomática.**

**Se recomienda utilizar la gammagrafía V/Q como prueba de imagen para el diagnóstico de los pacientes estables hemodinámicamente con sospecha de TEP aguda sintomática y i) alergia a los contrastes iodados o ii) insuficiencia renal grave (i.e., aclaramiento de creatinina <30 mL/min).**

**Figura S1. Algoritmo diagnóstico para el paciente con sospecha de TEP**

**a) Inestable hemodinámicamente**

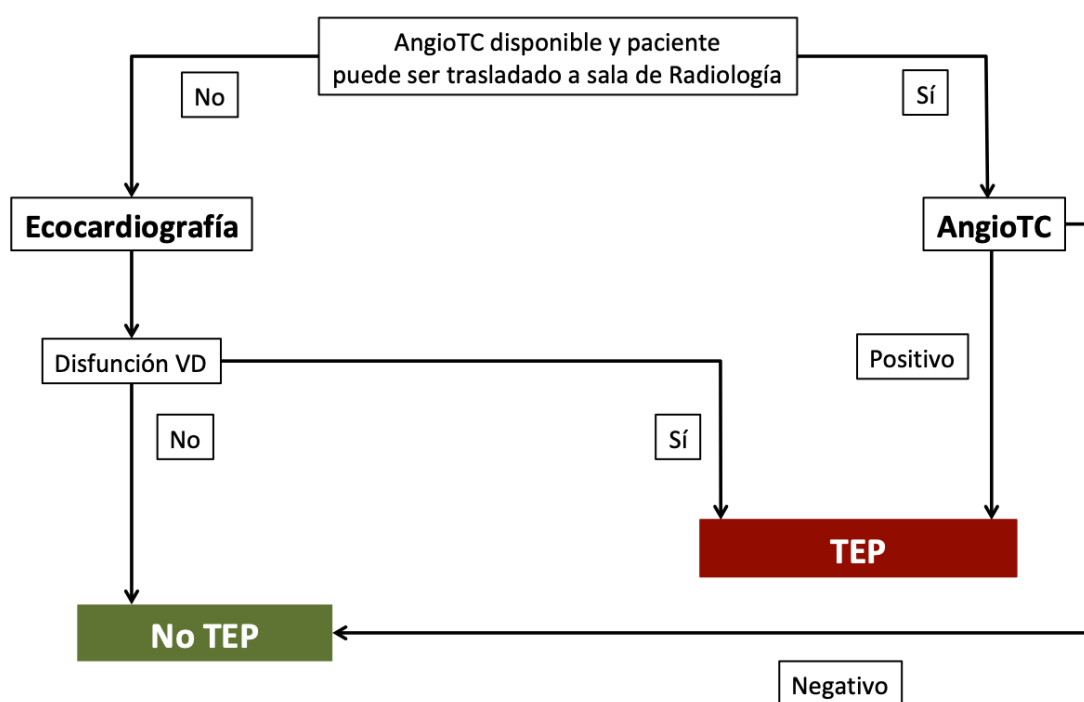

**Abreviaturas:** angioTC, angiotomografía computarizada; VD, ventrículo derecho; TEP, tromboembolia de pulmón.

## b) Estable hemodinámicamente

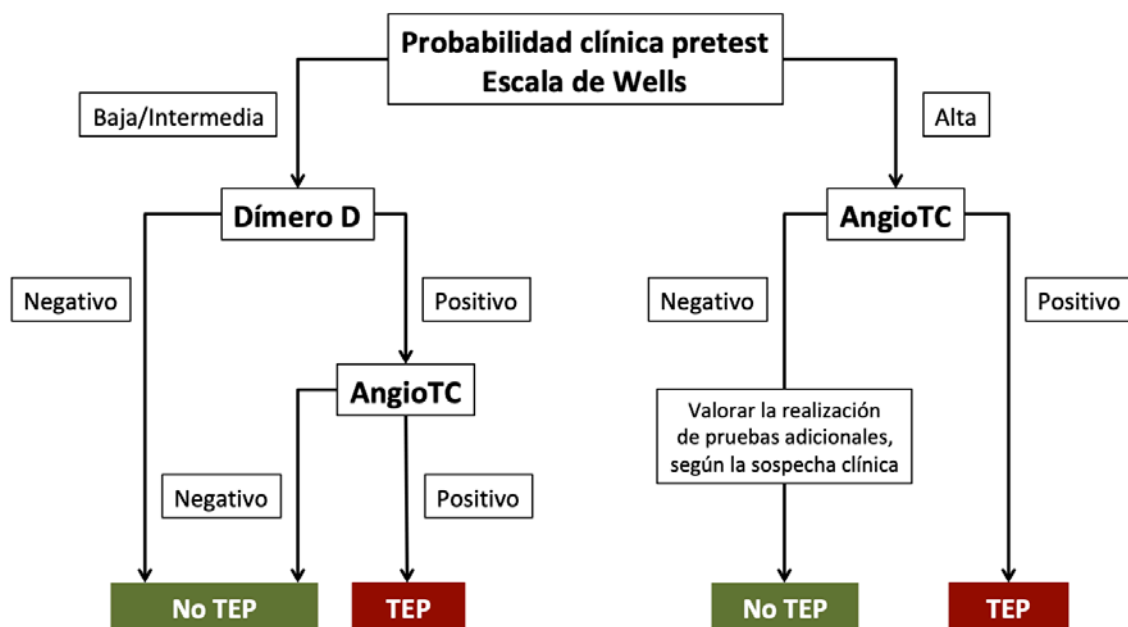

**Abreviaturas:** angioTC, angiotomografía computarizada; TEP, tromboembolia de pulmón.

**Figura S2. Algoritmo diagnóstico para la embarazada con sospecha de TEP**

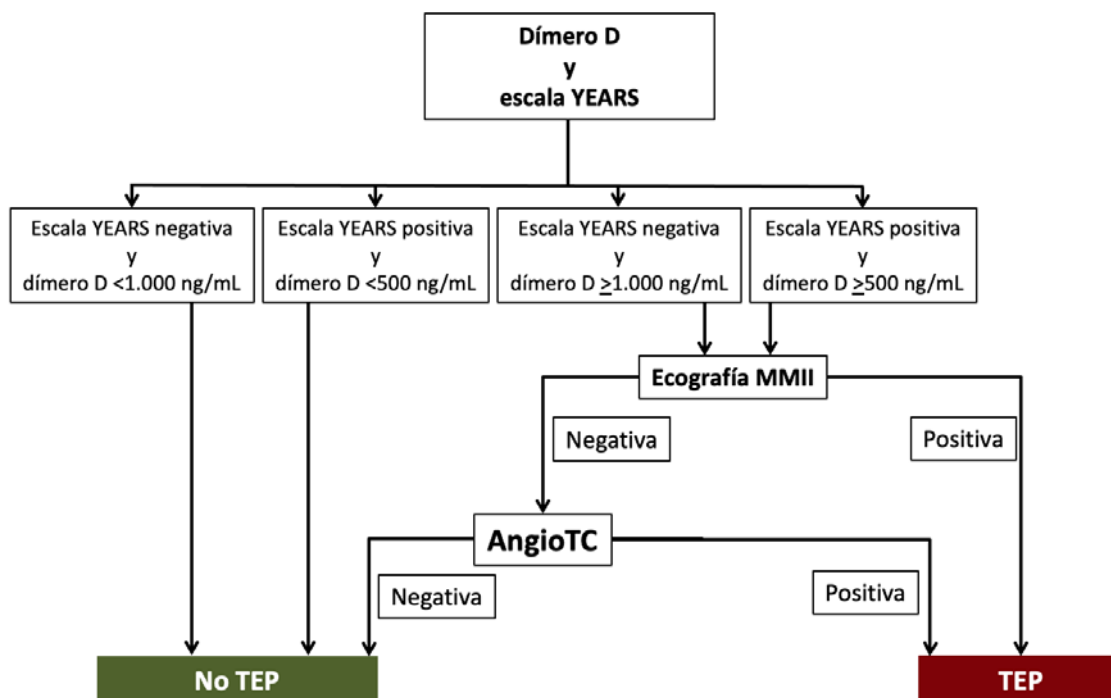

Escales YEARS: 1) signos clínicos de TVP; 2) hemoptisis; 3) TEP como diagnóstico más probable.

*Negativa*: todos los criterios ausentes.

*Positiva*: uno o más criterios presentes.

**Abreviaturas**: MMII, miembros inferiores; angioTC, angiotomografía computarizada; TEP, tromboembolia de pulmón.

4.- ¿Es seguro el tratamiento ambulatorio de pacientes seleccionados con TEP aguda sintomática? ¿Cómo se identifican estos pacientes?

**Se sugiere el tratamiento ambulatorio (i.e., en las primeras 24 horas después del diagnóstico) de los pacientes de riesgo bajo con TEP aguda sintomática.**

**Se sugiere utilizar de forma indistinta la escala *Pulmonary Embolism Severity Index* (PESI) simplificada o los criterios de Hestia para identificar a los pacientes de riesgo bajo subsidiarios de tratamiento ambulatorio.**

**Tabla S2. Escala PESIs y criterios de Hestia**

| Escala PESIs                                         |            |
|------------------------------------------------------|------------|
| Variable                                             | Puntuación |
| Edad >80 años                                        | 1          |
| Historia de cáncer                                   | 1          |
| Historia de enfermedad cardiopulmonar crónica        | 1          |
| Frecuencia cardíaca $\geq 110$ /min                  | 1          |
| Tensión arterial sistólica <100 mm Hg                | 1          |
| Saturación de O <sub>2</sub> en sangre arterial <90% | 1          |

Riesgo bajo: 0 puntos

Riesgo alto:  $\geq 1$  punto

**Abreviaturas:** PESIs, *Pulmonary Embolism Severity Index* simplificada.

| Criterios de Hestia                                                                                                                                                                                                                                                                                                                                                                                                                                    |
|--------------------------------------------------------------------------------------------------------------------------------------------------------------------------------------------------------------------------------------------------------------------------------------------------------------------------------------------------------------------------------------------------------------------------------------------------------|
| <b>Variable</b><br>¿Inestable hemodinámicamente?*<br>¿Necesidad de fibrinólisis o embolectomía?<br>¿Sangrado activo o riesgo alto de sangrado?†<br>¿Necesidad de oxígeno suplementario para mantener una SaO <sub>2</sub> >90% >24 h?<br>¿Razones médicas o sociales para tratar en el hospital >24 h?<br>¿Aclaramiento de creatinine <30 mL/min?‡<br>¿Insuficiencia hepática grave?§<br>¿Embarazo?<br>¿Historia de trombopenia inducida por heparina? |

Si la respuesta a cualquiera de las preguntas es Sí, el paciente no puede ser tratado ambulatoriamente.

\* Tensión arterial sistólica <100 mmHg con frecuencia cardíaca >100/min, o cualquier situación que requiera ingreso en Unidad de Cuidados Intensivos (según el investigador responsable).

† Sangrado gastrointestinal en los últimos 14 días, ictus reciente (en las últimas 4 semanas), cirugía reciente (en las últimas 2 semanas), discrasia sanguínea o trombopenia (plaquetas <75 x 10<sup>9</sup>/L), hipertensión no controlada (tensión arterial sistólica >180 mmHg o tensión arterial diastólica >110 mmHg).

‡ Según la fórmula de Cockcroft-Gault.

§ Según el clínico responsable.

### Figura S3. Identificación de pacientes con TEP aguda sintomática para tratamiento domiciliario

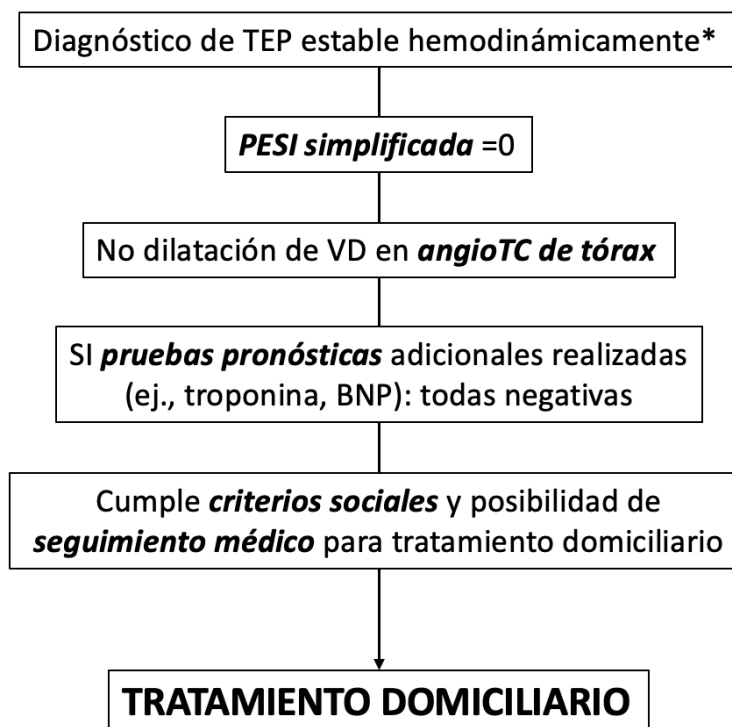

\* Tensión arterial sistólica  $\geq 90$  mmHg

**Abreviaturas:** TEP, tromboembolia de pulmón; PESI, *Pulmonary Embolism Severity Index*; VD, ventrículo derecho; angioTC, angiotomografía computarizada; BNP, péptido natriurético cerebral.

5.- ¿Son los ACODs el tratamiento anticoagulante de elección para la TEP?

¿Con qué excepciones?

**Se recomienda utilizar ACODs en lugar de antagonistas de la vitamina K para el tratamiento anticoagulante de la mayoría de los pacientes con TEP aguda sintomática.**

**Se recomienda no utilizar ACODs para el tratamiento anticoagulante de los pacientes i) con diagnóstico conocido de síndrome antifosfolípido triple positivo, ii) embarazadas y lactantes, o iii) con insuficiencia renal grave.**

**Figura S4. Posología de los anticoagulantes orales de acción directa para el tratamiento de la TEP**

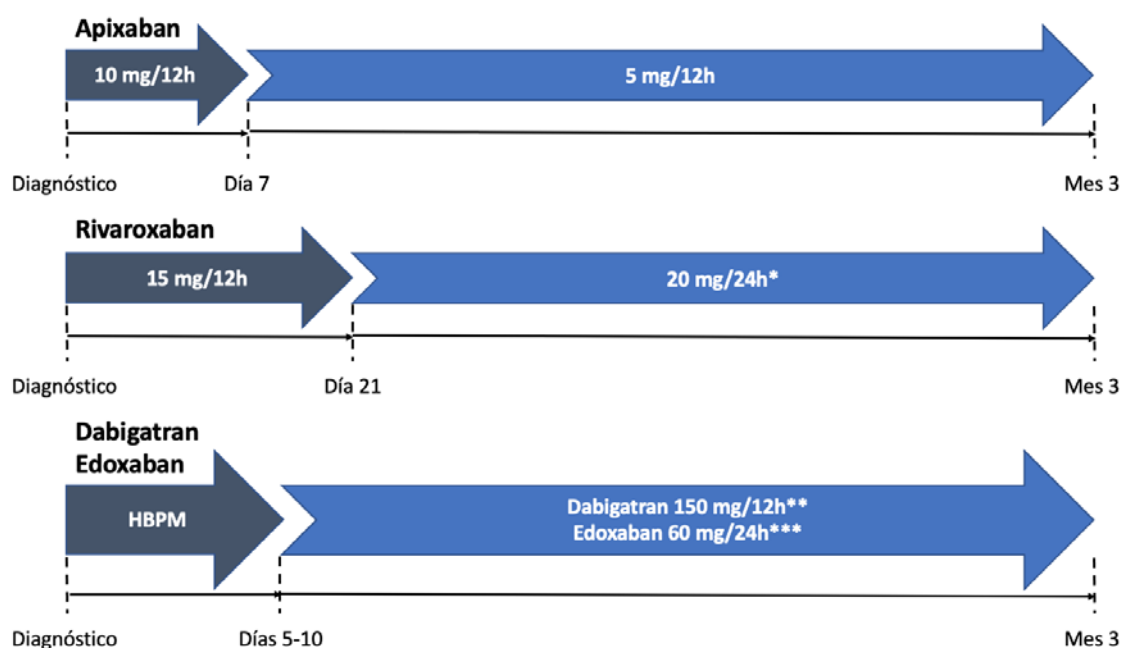

\* Considerar reducción de dosis a 15 mg/24h si aclaramiento de creatinina 15-49 mL/min y el riesgo de sangrado es mayor que el de recurrencia.

\*\* 110 mg/12h en  $\geq 80$  años, o uso de verapamil, o riesgo de sangrado alto.

\*\*\* 30 mg/24h si aclaramiento de creatinina 15-50 mL/min, o peso <60 Kg, o uso de inhibidores gp-P: ciclosporina, dronedarona, eritromicina, ketoconazol.

**Abreviaturas:** HBPM, heparina de bajo peso molecular.

### 7.- ¿Se debe tratar la TEP subsegmentaria?

**Se sugiere utilizar tratamiento anticoagulante para la mayoría de los pacientes con TEP subsegmentaria.**

**Tabla S3. Escala RIETE de predicción del riesgo de sangrado**

| Variable                                                       | Puntuación |
|----------------------------------------------------------------|------------|
| Sangrado mayor reciente*                                       | 2          |
| Creatinina >1.2 mg/dL                                          | 1,5        |
| Anemia<br>Hb <13 g/dL para hombres<br>Hb <12 g/dL para mujeres | 1,5        |
| Cáncer                                                         | 1          |
| Presentación como TEP (vs. TVP)                                | 1          |
| Edad >75 años                                                  | 1          |

\* En el mes anterior al diagnóstico de TEP.

Riesgo bajo: 0 puntos  
 Riesgo intermedio: 1-4 puntos  
 Riesgo alto: >4 puntos

**Abreviaturas:** TEP, tromboembolia de pulmón; TVP, trombosis venosa profunda.



9.- Cuando se indica el tratamiento de reperfusión en pacientes con TEP aguda sintomática, ¿cuál es el tratamiento de elección?

**Se recomienda utilizar fibrinólisis sistémica a dosis completas para la mayoría de los pacientes con TEP aguda sintomática e indicación de tratamiento de reperfusión.**

**Se sugiere utilizar tratamiento percutáneo dirigido por catéter (trombectomía percutánea, fibrinólisis local o ambas) o fibrinólisis sistémica a dosis reducidas para los pacientes con TEP aguda sintomática, indicación de tratamiento de reperfusión y contraindicaciones relativas para el uso de la fibrinólisis sistémica a dosis completas.**

**Se sugiere utilizar embolectomía quirúrgica o tratamiento percutáneo dirigido por catéter (trombectomía percutánea) para los pacientes con TEP aguda sintomática, indicación de tratamiento de reperfusión y contraindicación absoluta para el uso de la fibrinólisis sistémica a dosis completas.**

**Tabla S4. Definiciones**

| <b>Grupo</b>                                                 | <b>Definición</b>                                                                                        |
|--------------------------------------------------------------|----------------------------------------------------------------------------------------------------------|
| TEP de riesgo alto<br>(masiva o inestable hemodinámicamente) | Shock o TAS <90mmHg o caída de la TAS $\geq 40$ mmHg no debida a sepsis, hipovolemia o arritmia cardiaca |
| TEP de riesgo intermedio-alto                                | TAS $\geq 90$ mmHg, acompañada de disfunción de ventrículo derecho y de daño miocárdico                  |

**Abreviaturas:** TEP, tromboembolia de pulmón; TAS, tensión arterial sistólica.

**Tabla S5. Escala BACS para estimar el riesgo de sangrado en pacientes con TEP que reciben fibrinólisis**

| Variable                 | Puntos |
|--------------------------|--------|
| Sangrado mayor reciente* | 3      |
| Edad >75 años            | 1      |
| Cáncer activo            | 1      |
| Síncope                  | 1      |

\* En el mes anterior al diagnóstico de TEP.

Riesgo bajo: 0 puntos  
Riesgo intermedio: 1-3 puntos  
Riesgo alto: >3 puntos

10.- *¿Cuánto debe durar el tratamiento anticoagulante de los pacientes con TEP?*

**Se recomienda suspender la anticoagulación a los 3 meses de un primer episodio de TEP provocada por un factor de riesgo transitorio, mayor y resuelto.**

**Se recomienda el tratamiento anticoagulante indefinido para los pacientes con un factor de riesgo permanente mayor (ej., cáncer activo, síndrome antifosfolípido, historia de dos o más episodios trombóticos idiopáticos).**

**Se recomienda el tratamiento anticoagulante indefinido para los hombres con TEP idiopática.**

**Se sugiere utilizar herramientas adicionales (ej., características clínicas, dímero D, escalas predictoras, estudios de trombofilia) para decidir la duración del tratamiento anticoagulante en i) mujeres con TEP idiopática, ii) pacientes con TEP secundaria a un factor de riesgo transitorio, menor y resuelto, iii) pacientes que desean suspender la anticoagulación (con independencia de su riesgo de recurrencia) y iv) pacientes con una relación incierta riesgo/beneficio para el uso de tratamiento anticoagulante indefinido (ej., hombres con TEP idiopática y riesgo alto de sangrado).**

**Tabla S6. Factores que orientan al uso de anticoagulación indefinida**

| <b>Factor</b>                                     | <b>Comentarios</b>                                                                                                           |
|---------------------------------------------------|------------------------------------------------------------------------------------------------------------------------------|
| Dímero D (al mes de suspender la anticoagulación) | Un dímero D positivo favorece el tratamiento indefinido.                                                                     |
| TEP de riesgo alto o de riesgo intermedio-alto    | Aunque no hay datos concluyentes, la gravedad de la presentación favorece el tratamiento indefinido.                         |
| Hipertensión pulmonar persistente                 | La hipertensión pulmonar tromboembólica crónica obliga al tratamiento anticoagulante de por vida.                            |
| Trombosis residual                                | La obstrucción vascular residual está siendo estudiada como factor de riesgo de recurrencia al suspender la anticoagulación. |

|                         |                                                                                                                                                                                                                                                                                                                                                                                                                                                                                                                  |
|-------------------------|------------------------------------------------------------------------------------------------------------------------------------------------------------------------------------------------------------------------------------------------------------------------------------------------------------------------------------------------------------------------------------------------------------------------------------------------------------------------------------------------------------------|
| Modelo de Viena         | En pacientes con ETEV idiopática, estima el riesgo de recurrencia al suspender la anticoagulación según el sexo, la localización de la ETEV y los niveles de dímero D. No ha sido adecuadamente validado.                                                                                                                                                                                                                                                                                                        |
| Escala DASH             | Un dímero D elevado, edad <50 años, sexo varón y ETEV no asociada al uso de estrógenos se asocian a un riesgo aumentado de recurrencia al suspender la anticoagulación en pacientes con ETEV idiopática. No ha sido adecuadamente validada.                                                                                                                                                                                                                                                                      |
| Escala HERDOO2          | Hiperpigmentación, edema y/o enrojecimiento de la pierna (1 punto por la presencia de $\geq 1$ de ellas), dímero D $\geq 250$ ng/mL mientras la paciente recibe anticoagulación (1 punto), obesidad (índice masa corporal $\geq 30$ Kg/m <sup>2</sup> ) (1 punto) y edad $\geq 65$ años (1 punto). Habitualmente recomendamos suspender la anticoagulación a las mujeres con TEP idiopática y una puntuación <2, y mantenerla de forma indefinida a aquellas con $\geq 2$ puntos. No debe utilizarse en hombres. |
| Trombofilia hereditaria | De forma aislada es poco útil para tomar decisiones sobre la duración del tratamiento (ver <b>Recomendación 11</b> )                                                                                                                                                                                                                                                                                                                                                                                             |

**Abreviaturas:** TEP, tromboembolia de pulmón; ETEV, enfermedad tromboembólica venosa.

*11.- ¿Está indicada la realización de estudios de trombofilia en pacientes con TEP?*

**Se recomienda no realizar estudios de trombofilia para decidir la duración de la anticoagulación a la mayoría de los pacientes con TEP.**

**Se recomienda no realizar una determinación de anticuerpos antifosfolípido antes de iniciar anticoagulación con ACODs por un episodio de TEP aguda sintomática.**

**Tabla S7. Estudios de trombofilia**

| <b>Prueba</b>                               | <b>Artefacto por episodio trombótico agudo</b> | <b>Artefacto por tratamiento anticoagulante</b> | <b>Comentario</b>                                                     |
|---------------------------------------------|------------------------------------------------|-------------------------------------------------|-----------------------------------------------------------------------|
| <b>Antitrombina (funcional)</b>             | Sí                                             | Sí (heparina, ACOD)                             | Si alterada, evaluar niveles antigénicos +/- estudio genético         |
| <b>Proteína C funcional</b>                 | Sí                                             | Sí (AVK, ACOD)                                  | Si alterada, evaluar niveles antigénicos +/- estudio genético         |
| <b>Proteína S funcional</b>                 | Sí                                             | Sí (AVK, ACOD)                                  | Si alterada, evaluar PS antigénica total y libre +/- estudio genético |
| <b>Resistencia a la proteína C activada</b> | Sí                                             | Sí (AVK, ACOD)                                  | La principal causa es el FV Leiden, pero existen otras                |
| <b>FV Leiden</b>                            | No                                             | No                                              | -                                                                     |
| <b>Protrombina G20210A</b>                  | No                                             | No                                              | -                                                                     |
| <b>Anticoagulante lúpico*</b>               | No                                             | Sí (heparina, AVK, ACOD)                        | -                                                                     |
| <b>Anticuerpos anticardiolipina*</b>        | No                                             | No                                              | Importa el título de anticuerpos IgG e IgM                            |
| <b>Anticuerpos anti-β2 glicoproteína I*</b> | No                                             | No                                              | Importa el título de anticuerpos IgG e IgM                            |

|                     |    |    |                                                             |
|---------------------|----|----|-------------------------------------------------------------|
| <b>Homocisteína</b> | No | No | No se recomienda estudiar el polimorfismo C677T de la MTHFR |
|---------------------|----|----|-------------------------------------------------------------|

\* Requiere confirmación con una segunda muestra al menos 12 semanas después.

**Abreviaturas:** ACOD, anticoagulantes orales de acción directa; AVK, antagonistas de la vitamina K; PS, proteína S; FV, factor V; MTHFR, metilentetrahidrofolato reductasa.
